# Supplementary material for: Building cell-containing multilayered phospholipid polymer hydrogels for controlling the diffusion of a bioactive reagent
Source: Royal Society of Chemistry journal article supplement (doi:10.1039/c5ra05299h), 2015-01-01
Supplement: c5ra05299h1.pdf [file c5ra05299h1.pdf]

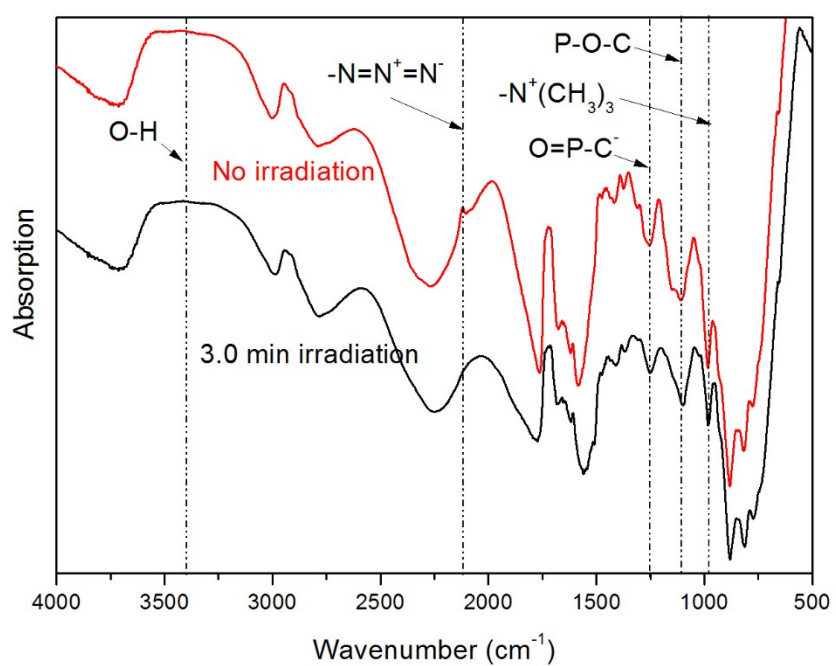

**Figure S1.** FT-IR reflection absorption spectra of PMBV/AWP multilayer hydrogel membranes photocrosslinked by UV irradiation

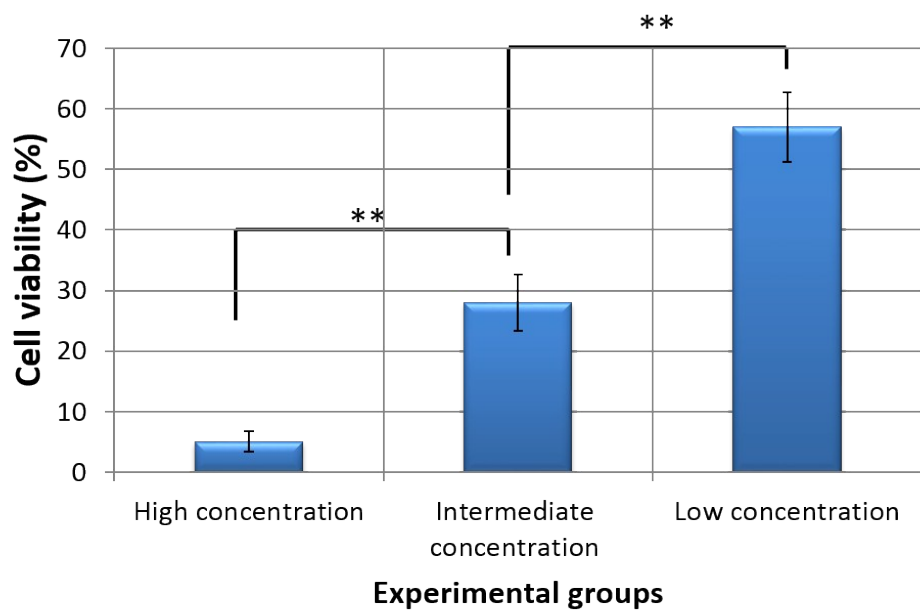

**Figure S2.** Regulation of cellular viability by the PTX concentration. Cell viability is shown as average  $\pm$  SD ( $n=3$ ,  $\alpha=0.05$ , \*\*  $p<0.01$ ).
